# Supplementary material
Source: publisher figshare collection journal article supplement (https://acs.figshare.com/ndownloader/files/3919339)
Supplement: Supplementary file 1 [file 3919339]

# Supplementary material

## Synthesis, Crystal Structure, Thermal Decomposition and $^{11}\text{B}$ MAS NMR

### Characterization of $\text{Mg}(\text{BH}_4)_2(\text{NH}_3\text{BH}_3)_2$

Lars H. Jepsen<sup>a</sup>, Voraksmy Ban<sup>b</sup>, Kasper T. Møller<sup>a</sup>, Young-Su Lee<sup>c</sup>, Young Whan Cho<sup>c</sup>, Flemming Besenbacher<sup>d</sup>, Yaroslav Filinchuk<sup>b</sup>, Jørgen Skibsted<sup>e</sup> and Torben R. Jensen<sup>a\*</sup>

<sup>a</sup>*Center for Materials Crystallography, Interdisciplinary Nanoscience Center and Department of Chemistry, Aarhus University, Langelandsgade 140, DK-8000 Aarhus C, Denmark*

<sup>b</sup>*Institute of Condensed Matter and Nanosciences, Université catholique de Louvain, Place L. Pasteur 1, B-1348, Louvain-la-Neuve, Belgium*

<sup>c</sup>*High Temperature Energy Materials Research Center, Korea Institute of Science and Technology, Seoul 136-791, Republic of Korea*

<sup>d</sup>*Interdisciplinary Nanoscience Center (iNANO) and Department of Physics and Astronomy, Aarhus University, Ny Munkegade 120, DK-8000 Aarhus C, Denmark.*

<sup>e</sup>*Instrument Centre for Solid-State NMR Spectroscopy, Department of Chemistry and Interdisciplinary Nanoscience Center (iNANO), Aarhus University, Langelandsgade 140, DK-8000 Aarhus C, Denmark*

\*Corresponding author  
Torben R. Jensen, Ph.D., Associate Professor  
Center for Materials Crystallography  
iNANO and Department of Chemistry  
Langelandsgade 140  
DK-8000 Aarhus C  
Aarhus University  
Denmark

**Table S1** Experimental structural parameters for  $\text{Mg}(\text{BH}_4)_2(\text{NH}_3\text{BH}_3)_2$ , space group  $P2_12_12_1$  (No. 19),  $a = 14.41633(7)$ ,  $b = 13.21283(7)$ ,  $c = 5.11512(2)$  Å and  $V = 974.331(8)$  Å<sup>3</sup>

| Atom | Wyckoff site | $x$         | $y$        | $z$        | Occupancy | B (Å <sup>2</sup> ) |
|------|--------------|-------------|------------|------------|-----------|---------------------|
| Mg1  | 4a           | 0.88155(19) | 0.2570(2)  | 0.0430(3)  | 1         | 3.92(5)             |
| B2   | 4a           | 0.0002(4)   | 0.3681(4)  | 0.1995(12) | 1         | 4.12(11)            |
| H3   | 4a           | 0.0767(10)  | 0.344(2)   | 0.254(8)   | 1         | 2.0(2)              |
| H4   | 4a           | -0.001(2)   | 0.4580(7)  | 0.179(6)   | 1         | 2.0(2)              |
| H5   | 4a           | -0.021(2)   | 0.334(2)   | -0.006(3)  | 1         | 2.0(2)              |
| H6   | 4a           | -0.0521(17) | 0.344(2)   | 0.371(4)   | 1         | 2.0(2)              |
| B7   | 4a           | 0.7380(4)   | 0.8430(4)  | 0.7524(13) | 1         | 4.12(11)            |
| H8   | 4a           | 0.8115(13)  | 0.806(2)   | 0.822(6)   | 1         | 2.0(2)              |
| H9   | 4a           | 0.741(2)    | 0.855(2)   | 0.520(2)   | 1         | 2.0(2)              |
| H10  | 4a           | 0.6807(17)  | 0.7817(19) | 0.818(6)   | 1         | 2.0(2)              |
| H11  | 4a           | 0.712(2)    | 0.9221(13) | 0.855(4)   | 1         | 2.0(2)              |
| N12  | 4a           | 0.6845(3)   | 0.3614(3)  | 0.7406(10) | 1         | 6.36(13)            |
| B13  | 4a           | 0.7860(4)   | 0.3868(4)  | 0.8288(11) | 1         | 4.12(11)            |
| H14  | 4a           | 0.677(2)    | 0.363(2)   | 0.5454(19) | 1         | 2.0(2)              |
| H15  | 4a           | 0.667(2)    | 0.2942(12) | 0.809(5)   | 1         | 2.0(2)              |
| H16  | 4a           | 0.789(2)    | 0.398(2)   | 1.063(2)   | 1         | 2.0(2)              |
| H17  | 4a           | 0.8361(18)  | 0.3170(16) | 0.758(8)   | 1         | 2.0(2)              |
| H18  | 4a           | 0.8095(18)  | 0.4623(16) | 0.712(6)   | 1         | 2.0(2)              |
| H19  | 4a           | 0.642(2)    | 0.4104(18) | 0.834(5)   | 1         | 2.0(2)              |
| N20  | 4a           | 0.5829(3)   | 0.9825(4)  | 0.2814(10) | 1         | 6.36(13)            |
| B21  | 4a           | 0.5247(4)   | 0.8820(4)  | 0.3418(11) | 1         | 4.12(11)            |
| H22  | 4a           | 0.6507(8)   | 0.966(2)   | 0.287(8)   | 1         | 2.0(2)              |
| H23  | 4a           | 0.570(2)    | 1.010(2)   | 0.103(3)   | 1         | 2.0(2)              |
| H24  | 4a           | 0.4452(11)  | 0.880(2)   | 0.267(8)   | 1         | 2.0(2)              |
| H25  | 4a           | 0.567(2)    | 0.8142(17) | 0.229(7)   | 1         | 2.0(2)              |
| H26  | 4a           | 0.521(2)    | 0.870(2)   | 0.576(2)   | 1         | 2.0(2)              |
| H27  | 4a           | 0.571(2)    | 1.026(2)   | 0.432(4)   | 1         | 2.0(2)              |

**Detailed description of structure solution and refinement** The structure of the complex  $\text{Mg}(\text{BH}_4)_2(\text{NH}_3\text{BH}_3)_2$  was solved and refined from SR-PXD data measured at Diamond, UK. The final Rietveld refinement (see Figure 1) indicated that the sample contains  $\text{Mg}(\text{BH}_4)_2(\text{NH}_3\text{BH}_3)_2$  (86 wt%),  $\alpha\text{-Mg}(\text{BH}_4)_2$  (10 wt%) and 4 wt% of remaining  $\text{NH}_3\text{BH}_3$ .

The diffraction data from the new compound,  $\text{Mg}(\text{BH}_4)_2(\text{NH}_3\text{BH}_3)_2$ , were indexed with an orthorhombic unit cell,  $a = 14.41633(7)$ ,  $b = 13.21283(7)$ ,  $c = 5.11512(2)$  Å and  $V = 974.331(8)$  Å<sup>3</sup>, using EXPO 2011.<sup>1</sup> The systematic absences suggested the presence of glide planes, *i.e.*  $Pna2_1$  or  $Pnam$  ( $Z = 4$ ) as the most likely space groups. However, close examination shows that a number of weak reflections (*e.g.* 301, 021, 041) break both systematic absence conditions. The structure was solved in the space group  $P2_12_12_1$ , using global optimization in direct space implemented in the program FOX.<sup>2</sup> One Mg, two rigid tetrahedral  $\text{BH}_4^-$  anions and two rigid  $\text{NH}_3\text{BH}_3$  molecules were optimized using B—B 3.3 Å, N—N 2.5 Å and H—H 1.8 Å antibump restraints.

The structural model, shown in Table S1, was refined by the Rietveld method using the program Fullprof.<sup>3</sup> 81 atomic coordinates (7 non-H and 20 H-atoms) and 4 group isotropic atomic displacement factors were refined with 22 distance and 36 angle restraints (B-H distance 1.22 Å, N-H distances 1.00 Å and B-N 1.56 Å distances, all  $\text{sp}^3$  angles are fixed at 109.5°). Intensities of 1020 independent reflections were used, which are equivalent to 330 independent observations, accounting for the effective angular resolution of the diffraction data. The observation/parameter ratio is thus highly satisfactory, exceeding 4.5. The structure was checked for higher symmetry using ADDSYM routine in Platon.<sup>4</sup> The final discrepancy factors:  $R_p = 0.66$  %,  $R_{wp} = 0.97$  % (not corrected for background),  $R_p = 14.1$  %,  $R_{wp} = 8.4$  % (conventional Rietveld R-factors),  $R_{\text{Bragg}} = 6.1$  % and global  $\chi^2 = 28.9$ .

**Table S2.** Geometrical characteristics of the shortest dihydrogen bonds in  $\text{Mg}(\text{BH}_4)_2(\text{BH}_3\text{NH}_3)_2$  solved from SR-PXD.

| <b>Intermolecular</b> |         |       |      |         |      |             |       |              |       |
|-----------------------|---------|-------|------|---------|------|-------------|-------|--------------|-------|
| H...H                 | (Å)     | B-H   | (Å)  | N-H     | (Å)  | B-H...H     | (deg) | N-H...H      | (deg) |
| H4...H23              | 1.84(4) | B2-H4 | 1.19 | N20-H23 | 1.00 | B2-H4...H23 | 106   | N20-H23...H4 | 154   |
| H4...H27              | 2.25(4) | B2-H4 | 1.19 | N20-H27 | 0.98 | B2-H4...H27 | 90    | N20-H27...H4 | 146   |
| H3...H15              | 2.28(3) | B2-H3 | 1.18 | N12-H15 | 0.98 | B2-H3...H15 | 136   | N12-H15...H3 | 144   |
| <b>Intramolecular</b> |         |       |      |         |      |             |       |              |       |
| H...H                 |         |       |      |         |      |             |       |              |       |
| H9...H22              | 2.29(4) | B7-H9 | 1.20 | N20-H22 | 1.00 | B7-H9...H22 | 125   | N20-H22...H9 | 108   |

**Table S3** Bond distances from the refined DFT structure of  $\text{Mg}(\text{BH}_4)_2(\text{NH}_3\text{BH}_3)_2$  compared with those from the reported pristine  $\text{NH}_3\text{BH}_3$  and  $\alpha\text{-Mg}(\text{BH}_4)_2$ .

| <b>Bond</b>                                                                              | <b>Length (Å)</b>                                    |                                       |                                                |
|------------------------------------------------------------------------------------------|------------------------------------------------------|---------------------------------------|------------------------------------------------|
|                                                                                          | $\text{Mg}(\text{BH}_4)_2(\text{NH}_3\text{BH}_3)_2$ | $\text{NH}_3\text{BH}_3$ <sup>5</sup> | $\alpha\text{-Mg}(\text{BH}_4)_2$ <sup>6</sup> |
| Intramolecular                                                                           |                                                      |                                       |                                                |
| N–B                                                                                      | 1.577 – 1.591                                        | 1.58(2)                               |                                                |
| N–H ( $\text{NH}_3\text{BH}_3$ )                                                         | 1.026 – 1.033                                        | 0.96(3) – 1.07(4)                     |                                                |
| B–H ( $\text{NH}_3\text{BH}_3$ )                                                         | 1.207 – 1.234                                        | 1.15(3) – 1.18(3)                     |                                                |
| B–H ( $\text{BH}_4$ )                                                                    | 1.216 – 1.247                                        |                                       | 1.18(1)                                        |
| Mg–B                                                                                     | 2.389 – 2.475                                        |                                       | 2.31(3) – 2.53(2)                              |
| Mg–H ( $\text{BH}_4$ )( $\text{BH}_3$ )                                                  | 1.971 – 2.074                                        |                                       | 1.81(4) – 2.25(5)                              |
| $\text{H}^{\delta+}(\text{NH}_3\text{BH}_3)\text{--H}^{\delta-}(\text{NH}_3\text{BH}_3)$ | 2.063 – 2.458                                        | 2.02(3)                               |                                                |
| Intermolecular                                                                           |                                                      |                                       |                                                |
| $\text{H}^{\delta+}(\text{NH}_3\text{BH}_3)\text{--H}^{\delta-}(\text{BH}_4)$            | 1.957 – 2.445                                        |                                       |                                                |

**Table S4** DFT-optimized atomic positions for  $\text{Mg}(\text{BH}_4)_2(\text{NH}_3\text{BH}_3)_2$ . The experimental cell parameters from SR-PXD are used.

| Atom | Wyckoff site | Occupancy | $x$     | $y$    | $z$    |
|------|--------------|-----------|---------|--------|--------|
| Mg1  | $4a$         | 1         | 0.8816  | 0.2518 | 0.0350 |
| B2   | $4a$         | 1         | 0.0023  | 0.3613 | 0.1901 |
| H3   | $4a$         | 1         | 0.0779  | 0.3413 | 0.2821 |
| H4   | $4a$         | 1         | -0.0132 | 0.4521 | 0.1796 |
| H5   | $4a$         | 1         | 0.0007  | 0.3270 | 0.9654 |
| H6   | $4a$         | 1         | -0.0572 | 0.3231 | 0.3336 |
| B7   | $4a$         | 1         | 0.7395  | 0.8503 | 0.7140 |
| H8   | $4a$         | 1         | 0.8154  | 0.8151 | 0.7640 |
| H9   | $4a$         | 1         | 0.7263  | 0.8402 | 0.4745 |
| H10  | $4a$         | 1         | 0.6810  | 0.8038 | 0.8459 |
| H11  | $4a$         | 1         | 0.7304  | 0.9397 | 0.7653 |
| N12  | $4a$         | 1         | 0.6800  | 0.3526 | 0.7449 |
| B13  | $4a$         | 1         | 0.7826  | 0.3817 | 0.8315 |
| H14  | $4a$         | 1         | 0.6681  | 0.3700 | 0.5524 |
| H15  | $4a$         | 1         | 0.6649  | 0.2768 | 0.7671 |
| H16  | $4a$         | 1         | 0.7880  | 0.3702 | 0.0695 |
| H17  | $4a$         | 1         | 0.8362  | 0.3264 | 0.7092 |
| H18  | $4a$         | 1         | 0.7993  | 0.4687 | 0.7768 |
| H19  | $4a$         | 1         | 0.6310  | 0.3907 | 0.8531 |
| N20  | $4a$         | 1         | 0.5757  | 0.9953 | 0.3187 |
| B21  | $4a$         | 1         | 0.5253  | 0.8908 | 0.3630 |
| H22  | $4a$         | 1         | 0.6471  | 0.9918 | 0.3223 |
| H23  | $4a$         | 1         | 0.5576  | 0.0275 | 0.1425 |
| H24  | $4a$         | 1         | 0.4438  | 0.8970 | 0.3035 |
| H25  | $4a$         | 1         | 0.5618  | 0.8265 | 0.2219 |
| H26  | $4a$         | 1         | 0.5311  | 0.8696 | 0.5969 |
| H27  | $4a$         | 1         | 0.5580  | 0.0468 | 0.4621 |

**Table S5** Frequencies observed in FTIR for  $\text{Mg}(\text{BH}_4)_2(\text{NH}_3\text{BH}_3)_2$  compared with  $\text{NH}_3\text{BH}_3$  and  $\alpha$ - $\text{Mg}(\text{BH}_4)_2$ .

|              | $\text{Mg}(\text{BH}_4)_2(\text{NH}_3\text{BH}_3)_2$ | $\text{NH}_3\text{BH}_3$ | $\alpha$ - $\text{Mg}(\text{BH}_4)_2$ |
|--------------|------------------------------------------------------|--------------------------|---------------------------------------|
| N–H stretch: | 3307                                                 | 3304                     |                                       |
|              | 3250                                                 | 3248                     |                                       |
|              | 3176-3213 (w, broad)                                 | 3192                     |                                       |
|              |                                                      |                          |                                       |
| B–H stretch: | 2471                                                 | 2313                     | 2274                                  |
|              | 2397                                                 | 2283                     |                                       |
|              | 2299                                                 | 2210                     |                                       |
|              | 2247                                                 | 2113                     |                                       |
|              | 2182                                                 |                          |                                       |
|              |                                                      |                          |                                       |
| Fingerprint: | 1604                                                 | 1595                     | 1252                                  |
|              | 1419                                                 | 1372                     | 1118                                  |
|              | 1394                                                 | 1155                     |                                       |
|              | 1351                                                 | 1052                     |                                       |
|              | 1134                                                 |                          |                                       |
|              | 1043                                                 |                          |                                       |

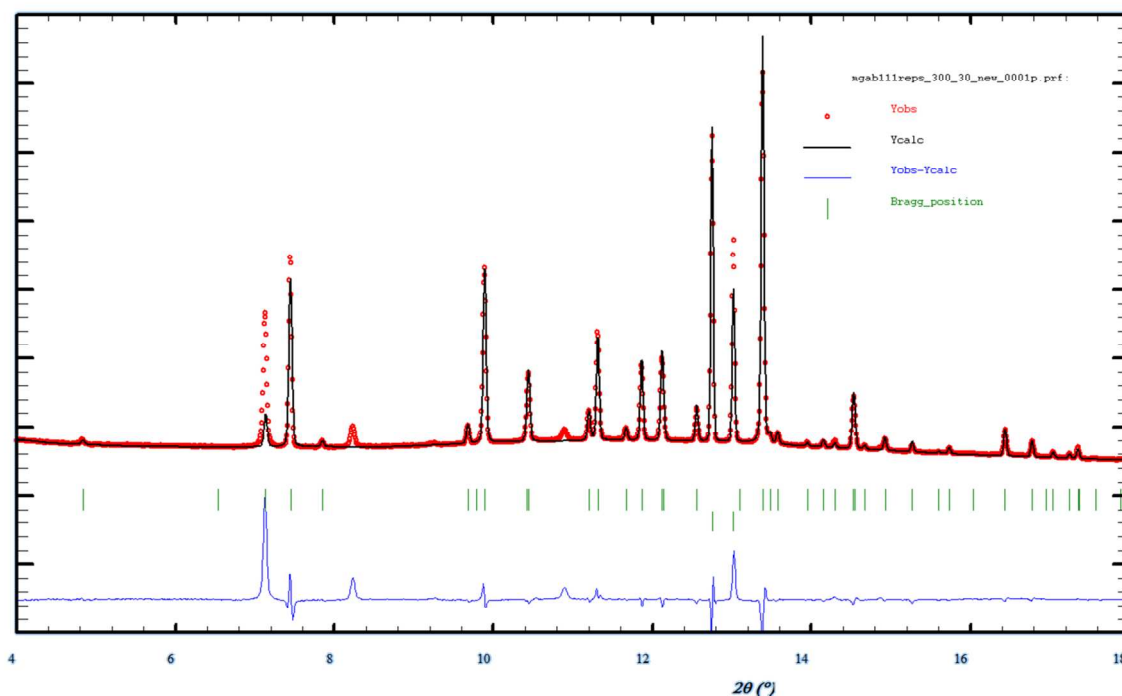

**Figure S1** Rietveld refinement of SR-PXD data for  $\alpha$ - $\text{Mg}(\text{BH}_4)_2\text{-NH}_3\text{BH}_3$  (1:2, s2) after 325 min BM measured at RT,  $\lambda = 0.823065 \text{ \AA}$ . Tic marks (top)  $\text{Mg}(\text{BH}_4)_2(\text{NH}_3\text{BH}_3)_2$  and  $\text{NH}_3\text{BH}_3$ . New reflections from **2** are observed at  $2\theta = 7.11, 8.23, 10.90$  and  $13.01^\circ$ .

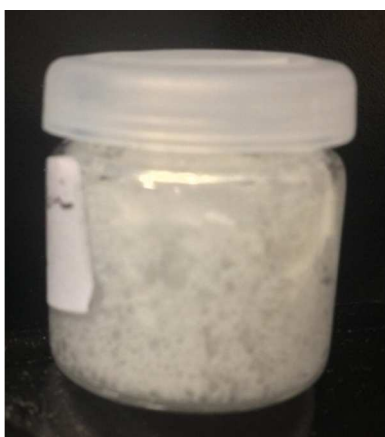

**Figure S2** Picture of a vial containing  $\text{Mg}(\text{BH}_4)_2(\text{NH}_3\text{BH}_3)_2$  in argon atmosphere stored at RT for several weeks. The powder has transformed into foam.

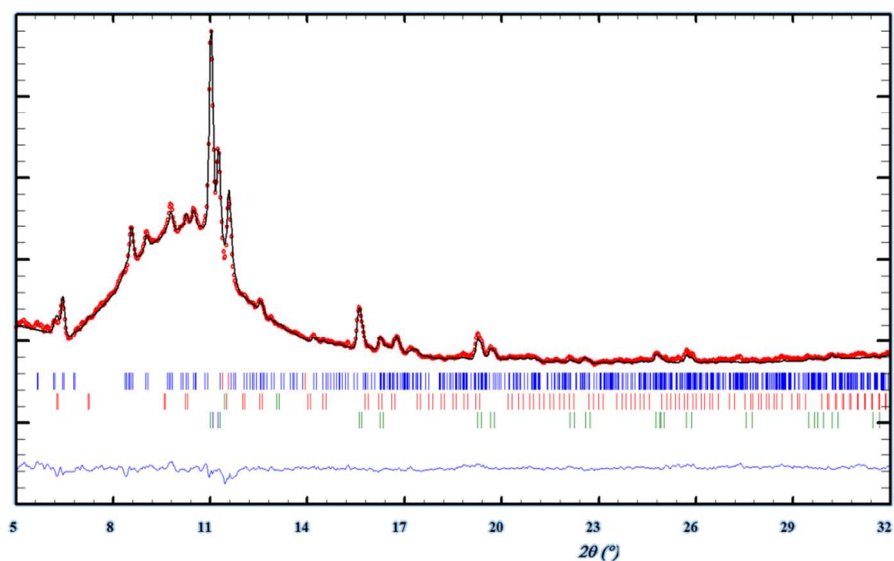

**Figure S3** Rietveld refinement of PXD data for  $\gamma$ -Mg(BH<sub>4</sub>)<sub>2</sub>-NH<sub>3</sub>BH<sub>3</sub> (1:0.66, s6) manually ground before compression,  $\lambda = 0.71073$  Å, RT. Tic marks in blue show Bragg positions of Mg(BH<sub>4</sub>)<sub>2</sub>(NH<sub>3</sub>BH<sub>3</sub>)<sub>2</sub> (50 wt%), in red  $\gamma$ -Mg(BH<sub>4</sub>)<sub>2</sub> (2 wt%) and in green NH<sub>3</sub>BH<sub>3</sub> (48 wt%).

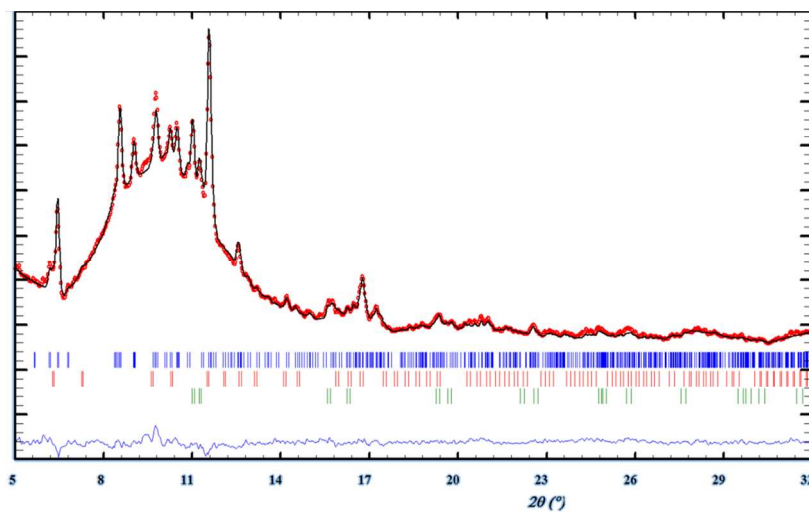

**Figure S4** Rietveld refinement of PXD data for  $\gamma$ -Mg(BH<sub>4</sub>)<sub>2</sub>-NH<sub>3</sub>BH<sub>3</sub> (1:0.66, s6) compressed into a pellet,  $\lambda = 0.71073$  Å, RT. Tic marks in blue show Bragg positions of Mg(BH<sub>4</sub>)<sub>2</sub>(NH<sub>3</sub>BH<sub>3</sub>)<sub>2</sub> (87 wt%), in red  $\gamma$ -Mg(BH<sub>4</sub>)<sub>2</sub> (1 wt%) and in green NH<sub>3</sub>BH<sub>3</sub> (12 wt%).



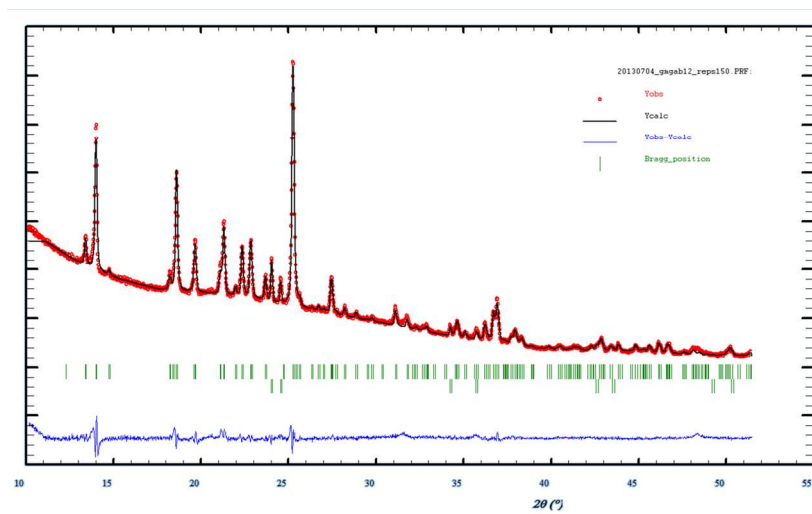

**Figure S5** Rietveld refinement of PXD data for  $\gamma$ -Mg(BH<sub>4</sub>)<sub>2</sub>-NH<sub>3</sub>BH<sub>3</sub> (1:2, s4) after 400 min BM,  $\lambda = 1.54056$  Å, RT. Tic marks (top) Mg(BH<sub>4</sub>)<sub>2</sub>(NH<sub>3</sub>BH<sub>3</sub>)<sub>2</sub> (95 wt%) and NH<sub>3</sub>BH<sub>3</sub> (5 wt%).

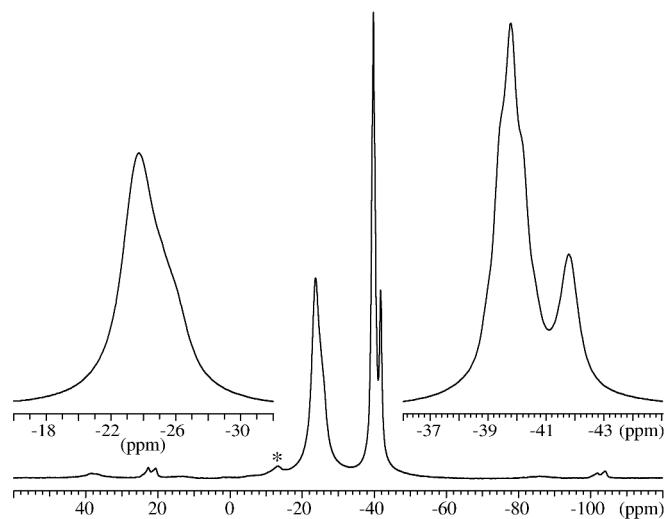

**Figure S6** <sup>11</sup>B MAS NMR spectrum of a mechanochemically treated sample of  $\gamma$ -Mg(BH<sub>4</sub>)<sub>2</sub>-NH<sub>3</sub>BH<sub>3</sub> (1:2, s4) acquired at 14.1 T using a spinning speed of  $\nu_r = 12.0$  kHz and a home-built 4 mm CP/MAS probe. The spectrum is recorded with a 0.5  $\mu$ s excitation pulse ( $\gamma B_1/2\pi = 60$  kHz), a relaxation delay of 10 s and 100 scans.

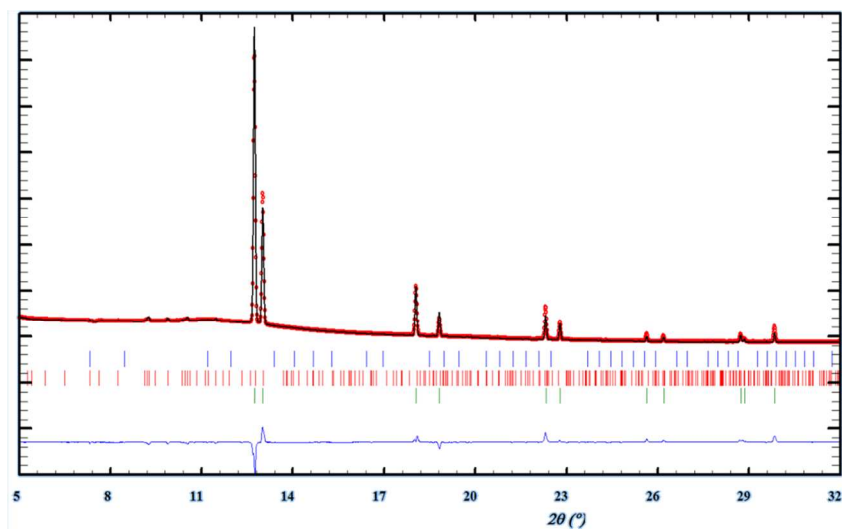

**Figure S7** Rietveld refinement of PXD data for amorphous  $\gamma$ -Mg(BH<sub>4</sub>)<sub>2</sub>-NH<sub>3</sub>BH<sub>3</sub> (1:2, s8) after compression,  $\lambda = 0.82257$  Å, RT. No Bragg reflections of Mg(BH<sub>4</sub>)<sub>2</sub>(NH<sub>3</sub>BH<sub>3</sub>)<sub>2</sub> or  $\gamma$ -Mg(BH<sub>4</sub>)<sub>2</sub> (blue tic marks) are observed. Small traces of  $\alpha$ -Mg(BH<sub>4</sub>)<sub>2</sub> are visible, while NH<sub>3</sub>BH<sub>3</sub> (green tic marks) constitutes the main phase with the non-crystalline (amorphous)  $\gamma$ -Mg(BH<sub>4</sub>)<sub>2</sub>.

### ***In situ* SR-PXD investigation of the ball milling reaction between $\text{Mg}(\text{BH}_4)_2$ and $\text{NH}_3\text{BH}_3$ (1:2)**

**Experimental:** Two independent experiments were performed at ID15 beamline at ESRF, Grenoble, to compare the reactivity of  $\alpha$ - and  $\gamma$ - $\text{Mg}(\text{BH}_4)_2$  with  $\text{NH}_3\text{BH}_3$  (1:2). The setup used was identical to the one described recently [Ivan Halasz et al., *Nature Protocols* 2013, 8, 1718-1729]. Approximately 200 mg of  $\text{Mg}(\text{BH}_4)_2$  and  $\text{NH}_3\text{BH}_3$  (1:2) were loaded in a Plexiglas 14 ml jar with two 7 mm-diameter balls in stainless steel. The ball milling/diffraction experiments were performed for 99 minutes with 20 Hz milling frequency; one diffraction pattern was obtained every 12.3 seconds, resulting in 482 patterns for each milling. The wavelength ( $\lambda = 0.146687 \text{ \AA}$ ) and the detector distance of 933.33 mm were determined by the  $\text{CeO}_2$  standard packed in a capillary and  $\text{LaB}_6$  in a 7 ml plastic jar, respectively.

**Results:** *In situ* SR-PXD of the ball milling process of  $\alpha$ - $\text{Mg}(\text{BH}_4)_2$ - $\text{NH}_3\text{BH}_3$  (1:2) are shown in Figure S8 and S9. The first obtained diffraction pattern (after 12 s of ball milling) reveals reflections from  $\alpha$ - $\text{Mg}(\text{BH}_4)_2$ ,  $\text{NH}_3\text{BH}_3$  and a single impurity peak at  $1.82^\circ$  (Figure S10). However, the impurity peak does not originate from either **1** or **2** and disappear after 13 min of ball milling. It is seen (Figure S9) that  $\text{Mg}(\text{BH}_4)_2(\text{NH}_3\text{BH}_3)_2$  is formed after the 61<sup>st</sup> pattern (after 12 minutes of ball milling). There are no unidentified reflections observed from any intermediates, but the  $\text{Mg}(\text{BH}_4)_2(\text{NH}_3\text{BH}_3)_2$  is formed directly from  $\alpha$ - $\text{Mg}(\text{BH}_4)_2$  and  $\text{NH}_3\text{BH}_3$ . Rietveld refinement of SR-PXD data after 99 min of ball milling is presented in Figure S11.

*In situ* SR-PXD of the ball milling process of  $\gamma$ - $\text{Mg}(\text{BH}_4)_2$ - $\text{NH}_3\text{BH}_3$  (1:2) is shown in Figure S12, and the conversion of  $\gamma$ - $\text{Mg}(\text{BH}_4)_2$  and  $\text{NH}_3\text{BH}_3$  into  $\text{Mg}(\text{BH}_4)_2(\text{NH}_3\text{BH}_3)_2$  as a function of milling time is presented in Figure S13. The first diffraction pattern after 12 seconds of milling (Figure S14) shows the reactants,  $\gamma$ - $\text{Mg}(\text{BH}_4)_2$  and  $\text{NH}_3\text{BH}_3$ . Formation of  $\text{Mg}(\text{BH}_4)_2(\text{NH}_3\text{BH}_3)_2$  initiates after  $\sim 5$  min of ball

milling and its phase fraction increases to nearly 100% after 20 minutes ball milling (Figure S13).

Thus, it is concluded that under the applied conditions there are no indications of entrance of  $\text{NH}_3\text{BH}_3$  into the pores of  $\gamma\text{-Mg}(\text{BH}_4)_2$ .

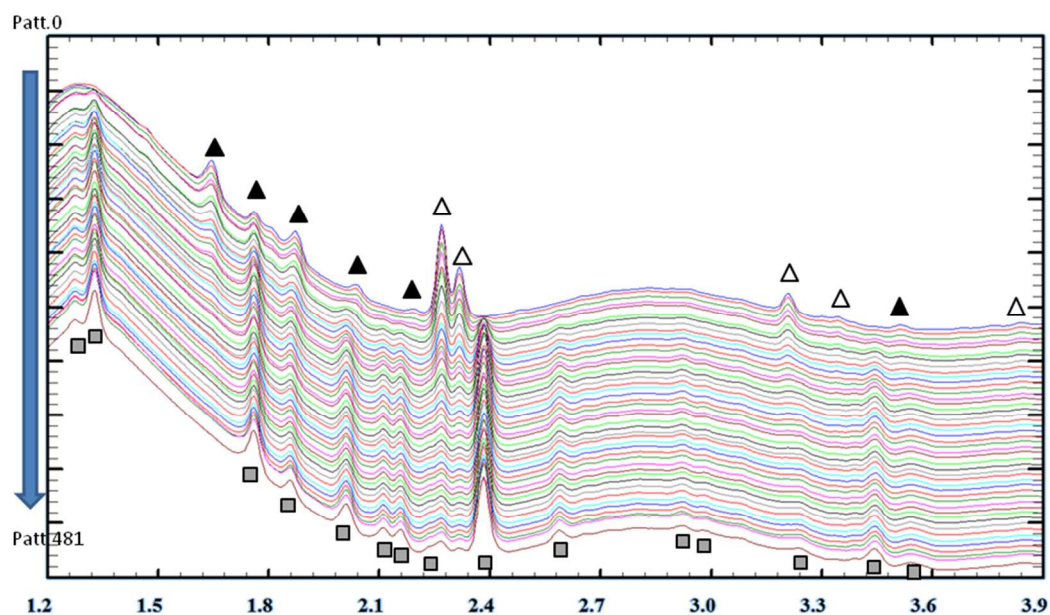

**Figure S8** *In situ* SR-PXD data of the reaction between  $\alpha\text{-Mg}(\text{BH}_4)_2$  and  $\text{NH}_3\text{BH}_3$  (1:2) every second minute (every ten's pattern is shown). The reaction evolves from top to bottom,  $\lambda = 0.146687 \text{ \AA}$ .

Symbols: ▲  $\alpha\text{-Mg}(\text{BH}_4)_2$ , Δ  $\text{NH}_3\text{BH}_3$ , ■  $\text{Mg}(\text{BH}_4)_2(\text{NH}_3\text{BH}_3)_2$ .

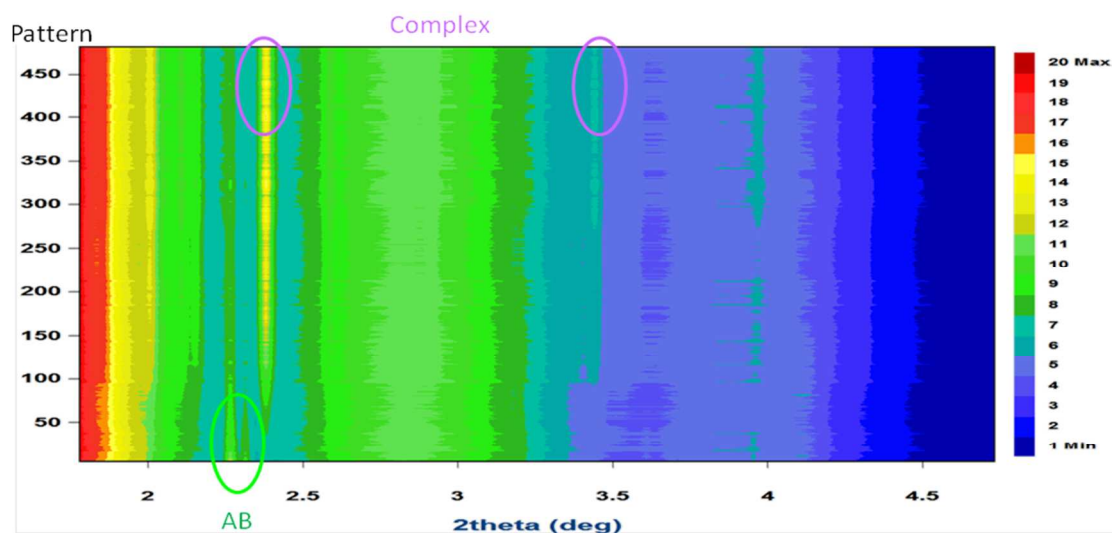

**Figure S9** SR-PXD patterns collected during 99 minutes of milling for  $\alpha$ -Mg(BH<sub>4</sub>)<sub>2</sub>–NH<sub>3</sub>BH<sub>3</sub> (1:2). The relevant diffraction peaks for Mg(BH<sub>4</sub>)<sub>2</sub>(NH<sub>3</sub>BH<sub>3</sub>)<sub>2</sub> and NH<sub>3</sub>BH<sub>3</sub> are highlighted by purple and green ellipses, respectively. The diffraction peaks from  $\alpha$ -Mg(BH<sub>4</sub>)<sub>2</sub> are difficult to distinguish as they coincide with the background generated by the plastic jar.  $\lambda = 0.146687$  Å.

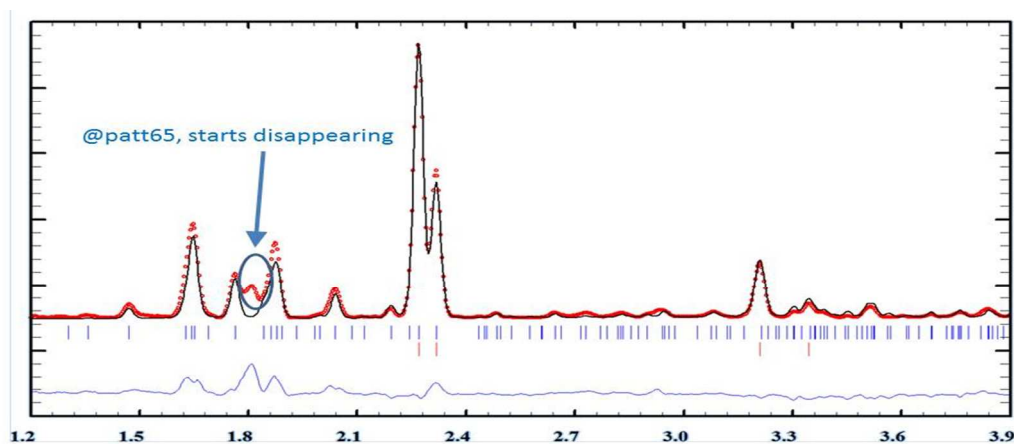

**Figure S10** Rietveld refinement of the data for the first diffraction pattern (collected 12 seconds after the milling was started) for  $\alpha$ -Mg(BH<sub>4</sub>)<sub>2</sub>–NH<sub>3</sub>BH<sub>3</sub> (1:2). The background generated by the plastic jar was subtracted for clarity. Peak positions for  $\alpha$ -Mg(BH<sub>4</sub>)<sub>2</sub> and NH<sub>3</sub>BH<sub>3</sub> are marked by blue and red

ticks, respectively. One unidentified impurity peak is observed at 1.82 °. Its intensity starts to decrease from the pattern 65 (~13 minutes of milling).

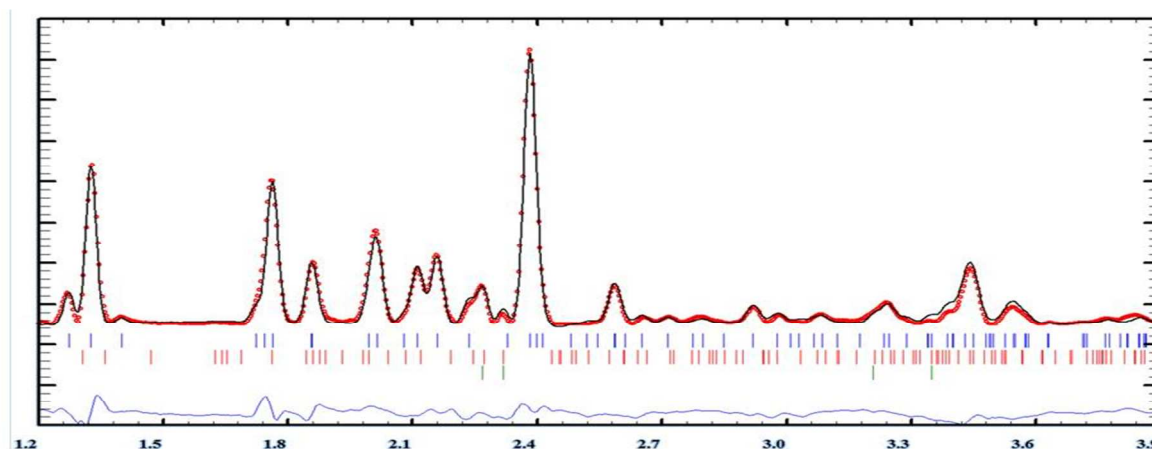

**Figure S11** Rietveld refinement of the last diffraction pattern collected 99 min after the ball milling process was started for  $\alpha$ -Mg(BH<sub>4</sub>)<sub>2</sub>-NH<sub>3</sub>BH<sub>3</sub> (1:2). The background generated by the plastic jar was subtracted for clarity. Peak positions for Mg(BH<sub>4</sub>)<sub>2</sub>(NH<sub>3</sub>BH<sub>3</sub>)<sub>2</sub> (95 wt%),  $\alpha$ -Mg(BH<sub>4</sub>)<sub>2</sub> (0 wt %) and NH<sub>3</sub>BH<sub>3</sub> (5 wt%) are marked by blue, red and green ticks, respectively.

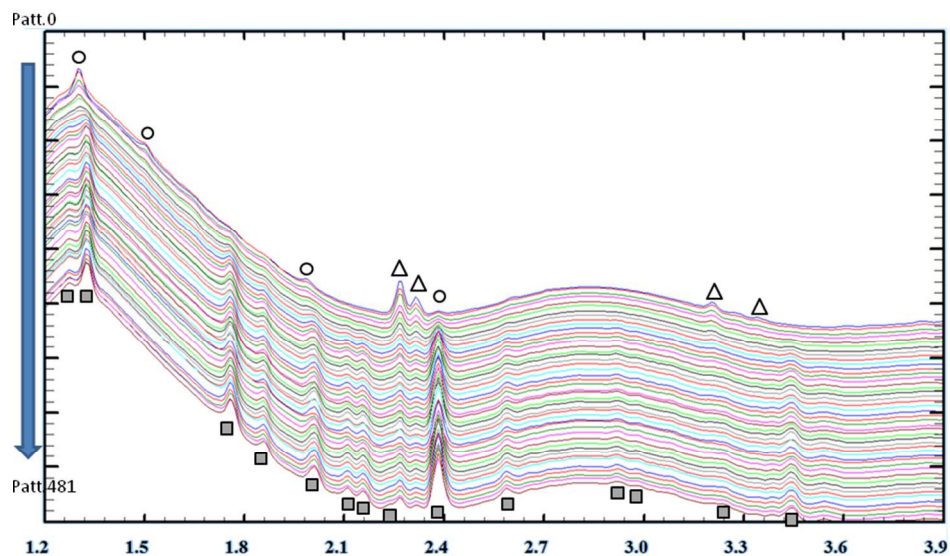

**Figure S12** SR-PXD monitoring of the reaction between  $\gamma$ - $\text{Mg}(\text{BH}_4)_2$  and  $\text{NH}_3\text{BH}_3$  (1:2) every two minutes (every ten's pattern is shown). The reaction evolves from top to bottom,  $\lambda = 0.146687 \text{ \AA}$ .

Symbols: o  $\gamma$ - $\text{Mg}(\text{BH}_4)_2$ ,  $\Delta$   $\text{NH}_3\text{BH}_3$ ,  $\square$   $\text{Mg}(\text{BH}_4)_2(\text{NH}_3\text{BH}_3)_2$ .

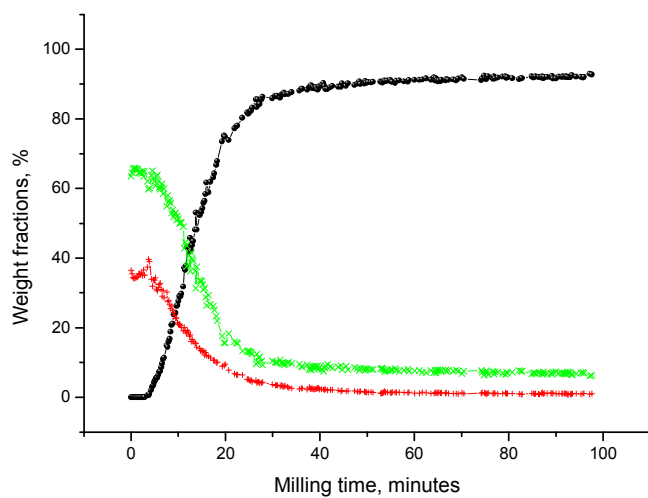

**Figure S13** Evolution of the crystalline compounds as a function of ball milling time. Legend:

$\text{Mg}(\text{BH}_4)_2(\text{NH}_3\text{BH}_3)_2$  (black),  $\gamma$ - $\text{Mg}(\text{BH}_4)_2$  (red) and  $\text{NH}_3\text{BH}_3$  (green).

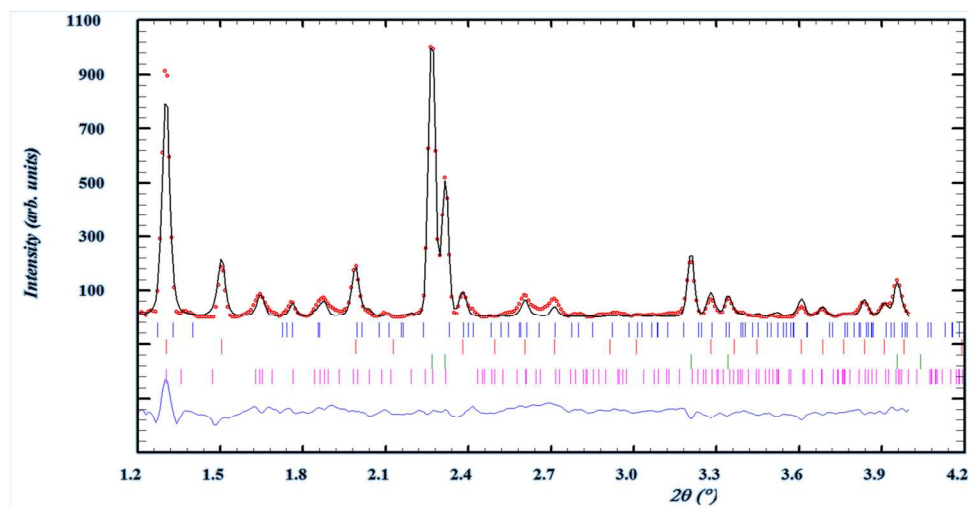

**Figure S14** Rietveld refinement for the first diffraction pattern (collected 12 seconds after the milling was started) for  $\gamma$ - $\text{Mg}(\text{BH}_4)_2$ - $\text{NH}_3\text{BH}_3$  (1:2). The background generated by the plastic jar was subtracted for clarity. Peak positions for  $\gamma$ - $\text{Mg}(\text{BH}_4)_2$  (32 wt%),  $\text{NH}_3\text{BH}_3$  (59 wt%),  $\text{Mg}(\text{BH}_4)_2(\text{NH}_3\text{BH}_3)_2$  (0 wt%) and  $\alpha$ - $\text{Mg}(\text{BH}_4)_2$  (9 wt %) are marked by red, green, blue and pink, respectively.



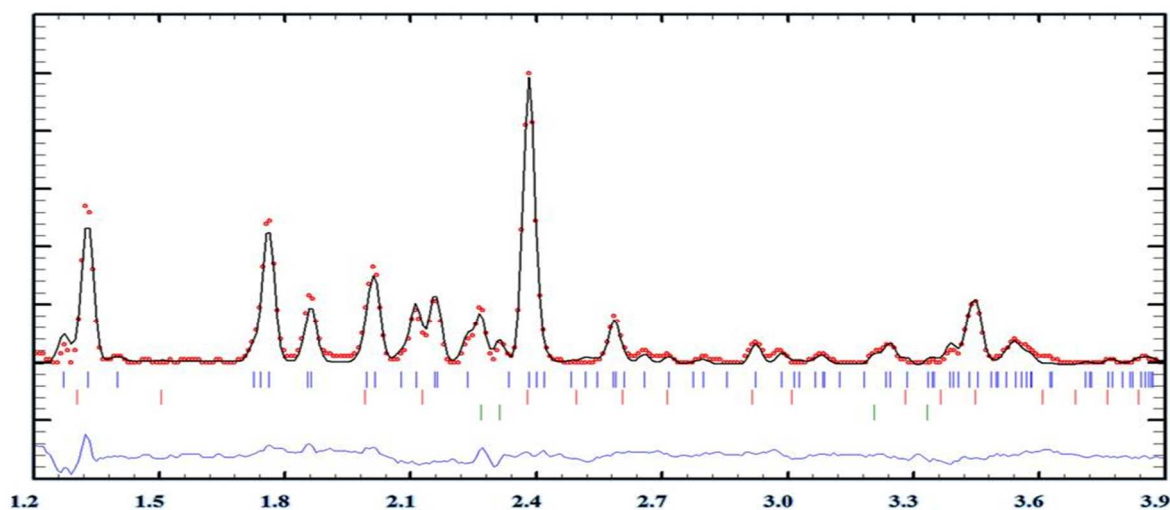

**Figure S15** Rietveld refinement of the last diffraction pattern collected 99 min after the ball milling process was started for  $\gamma$ -Mg(BH<sub>4</sub>)<sub>2</sub>–NH<sub>3</sub>BH<sub>3</sub> (1:2). The background generated by the plastic jar was subtracted for clarity. Peak positions for Mg(BH<sub>4</sub>)<sub>2</sub>(NH<sub>3</sub>BH<sub>3</sub>)<sub>2</sub> ( 93 wt%),  $\gamma$ -Mg(BH<sub>4</sub>)<sub>2</sub> (0.5 wt %) and NH<sub>3</sub>BH<sub>3</sub> (6.5 wt%) are marked by blue, red and green ticks, respectively.

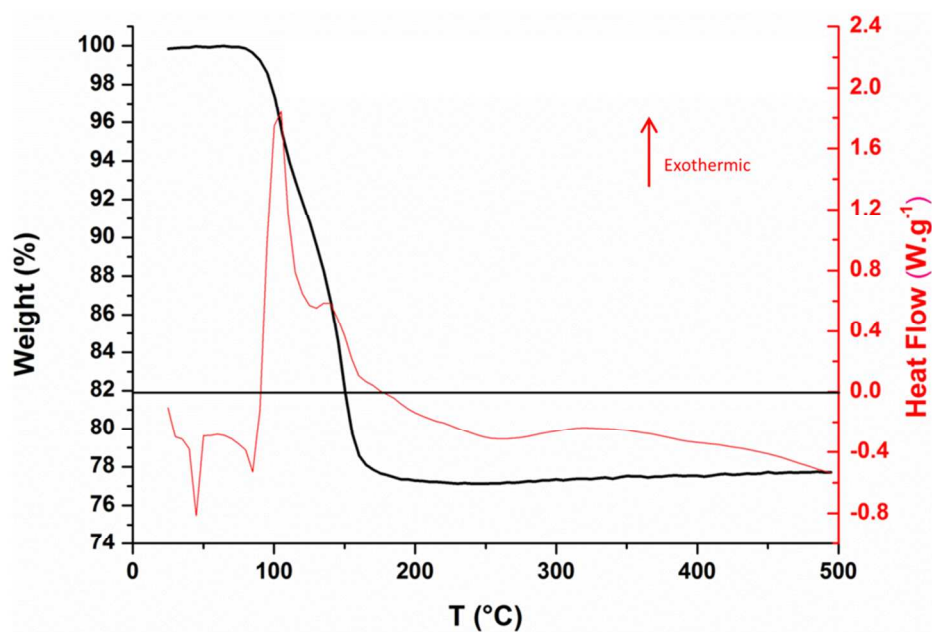

**Figure S16** Thermal analysis from TGA curve (black) and DSC curve (red) of  $\gamma$ - $\text{Mg}(\text{BH}_4)_2\text{-NH}_3\text{BH}_3$  (1:2, s7) heated from 25 to 500 °C (5 °C/min). The sample contains some unreacted amorphous  $\text{Mg}(\text{BH}_4)_2$  and  $\text{NH}_3\text{BH}_3$ .

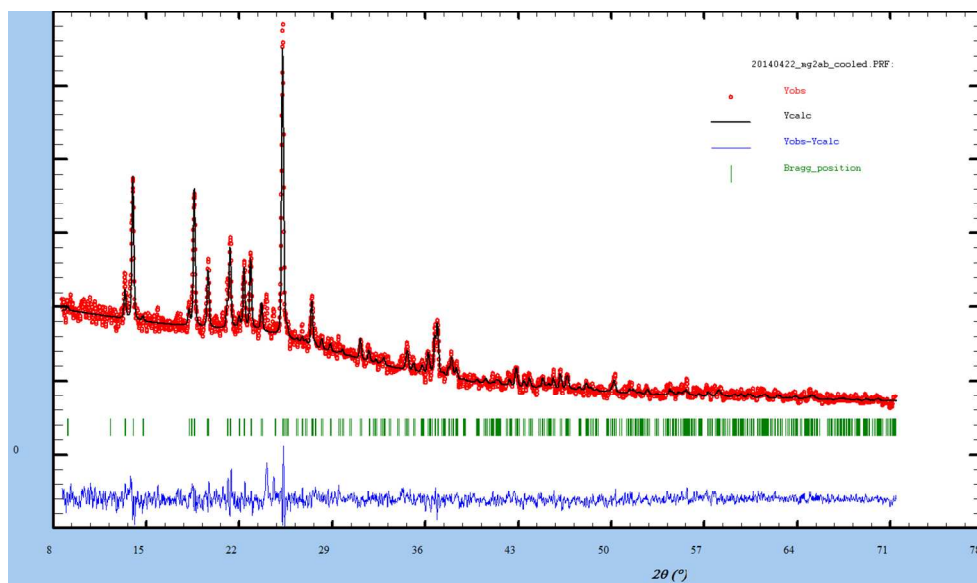

**Figure S17** Rietveld refinement of  $\text{Mg}(\text{BH}_4)_2(\text{NH}_3\text{BH}_3)_2$  (s2) heated to 55 °C and cooled to RT.  $\lambda = 1.54056 \text{ \AA}$ , RT. Peak positions for  $\text{Mg}(\text{BH}_4)_2(\text{NH}_3\text{BH}_3)_2$  is marked by green ticks.

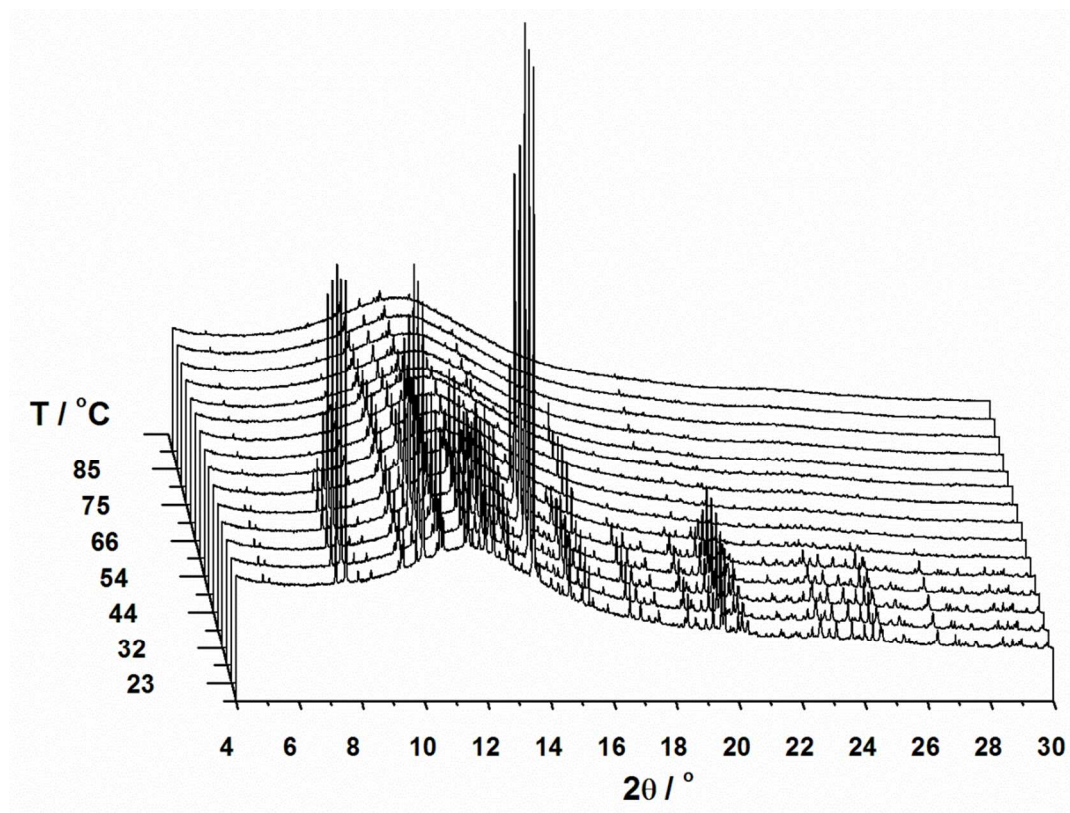

**Figure S18** *In situ* SR-PXD for  $\gamma$ - $\text{Mg}(\text{BH}_4)_2\text{-NH}_3\text{BH}_3$  (1:0.66, s6) heated from 22 to 88 °C (4.5 °C/min,  $\lambda = 0.82712$  Å, Diamond, I11). Traces of  $\alpha$ - $\text{Mg}(\text{BH}_4)_2$  is seen at  $T > 45$  °C after melting of  $\text{Mg}(\text{BH}_4)_2(\text{NH}_3\text{BH}_3)_2$ .

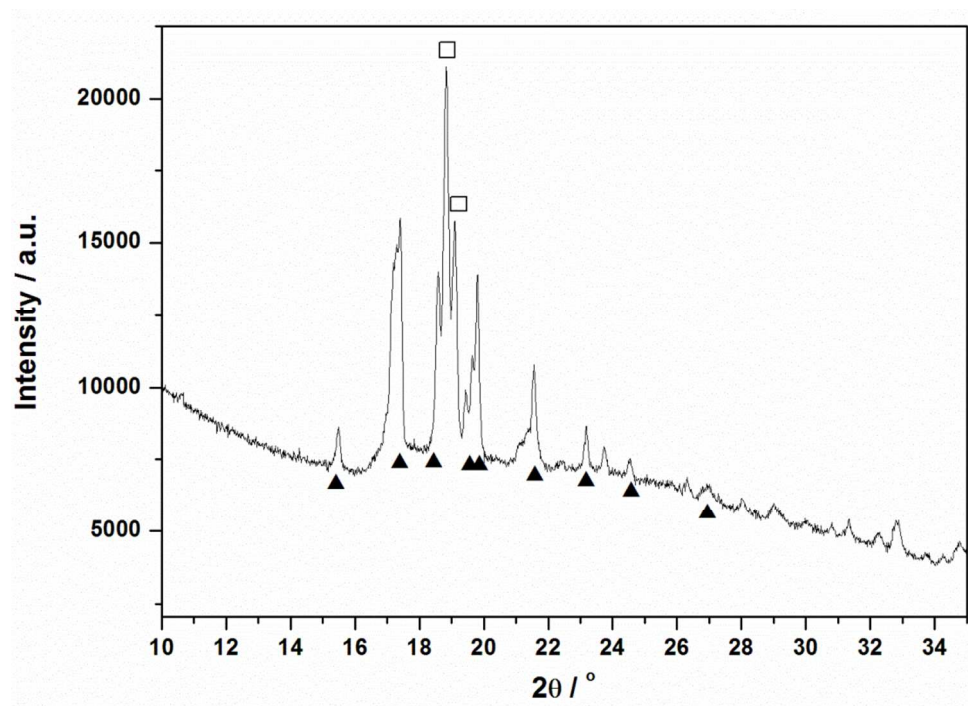

**Figure S19** PXD for  $\text{Mg}(\text{BH}_4)_2(\text{NH}_3\text{BH}_3)_2$  heated to 220 °C and cooled to RT,  $\lambda = 1.54056 \text{ \AA}$ .

Symbols:  $\blacktriangle$   $\alpha$ - $\text{Mg}(\text{BH}_4)_2$ ,  $\square$   $\beta'$ - $\text{Mg}(\text{BH}_4)_2$

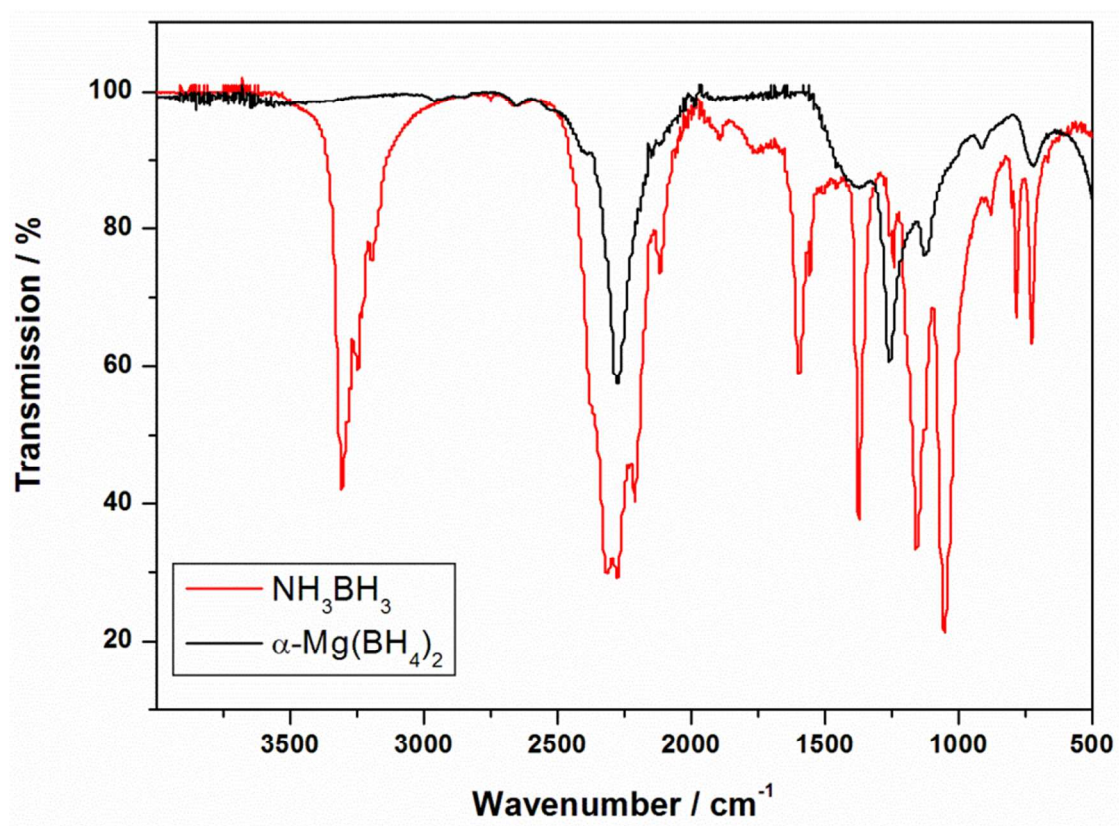

**Figure S20** FTIR spectra recorded for  $\text{Mg}(\text{BH}_4)_2$  (black) and  $\text{NH}_3\text{BH}_3$  (red) at RT.

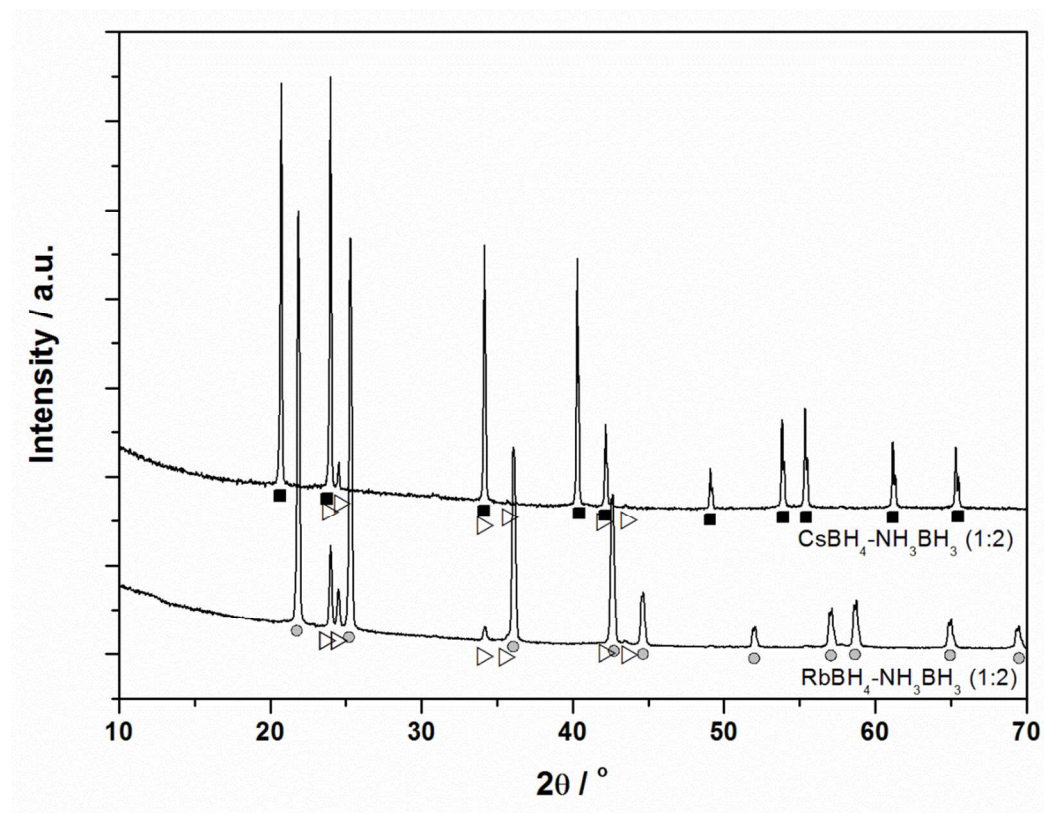

**Figure S21** PXD for  $\text{RbBH}_4\text{-NH}_3\text{BH}_3$  (1:2) and  $\text{CsBH}_4\text{-NH}_3\text{BH}_3$  (1:2) after mechanochemical treatment,  $\lambda = 1.54056 \text{ \AA}$ . Symbols: ■  $\text{CsBH}_4$ , ●  $\text{RbBH}_4$ , ▷  $\text{NH}_3\text{BH}_3$
